# Supplementary material for: The Somatic Reproductive Tissues of C. elegans Promote Longevity through Steroid Hormone Signaling
Source: PLoS Biol. 2010 Aug 31;8(8):e1000468. doi: 10.1371/journal.pbio.1000468 (PMC2930862; doi:10.1371/journal.pbio.1000468)
Supplement: Table S2 — Overexpression of DAF-9/CYP450 extends the lifespan of animals that lack both the somatic gonad and germ cells. (0.02 MB XLS) [file pbio.1000468.s004.xls]

## Sheet: Sheet1
Supplemental Table 2: Over-expression of DAF-9/CYP450 extends the lifespan of animals that lack both the germ cells and somatic gonad
Genotype	Expression		Mean Lifespan ± SEM (days)	n (obs/total)	p value (v intact)	p value (v gc(-))
daf-9(e1406); Pdaf-9::DAF-9::GFP		intact	16.3 ± 0.802	72/80
daf-9(e1406); Pdaf-9::DAF-9::GFP		gc(-)	25.1 ± 1.37	72/87	<0.0001
daf-9(e1406); Pdaf-9::DAF-9::GFP		gc(-); sg(-)	21.1 ± 1.06	52/60	0.0003	0.0076
daf-9(e1406); Psdf-9::DAF-9::GFP	XXX cells	intact	17.9 ± 0.528	76/100
daf-9(e1406); Psdf-9::DAF-9::GFP	XXX cells	gc(-)	20.6 ± 0.811	63/76	0.001
daf-9(e1406); Psdf-9::DAF-9::GFP	XXX cells	gc(-); sg(-)	20.1 ± 0.622	98/104	0.002	0.62
daf-9(e1406); Pdpy-7::DAF-9::GFP	hypodermis	intact	15.0 ± 0.578	55/90
daf-9(e1406); Pdpy-7::DAF-9::GFP	hypodermis	gc(-)	17.6 ± 0.506	67/82	0.003
daf-9(e1406); Pdpy-7::DAF-9::GFP	hypodermis	gc(-); sg(-)	19.8 ± 0.910	81/89	<0.0001	0.048
daf-9(e1406); Pcol-12::DAF-9::GFP	hypodermis	intact	18.5 ± 0.624	70/90
daf-9(e1406); Pcol-12::DAF-9::GFP	hypodermis	gc(-)	19.4 ± 0.857	47/61	0.31
daf-9(e1406); Pcol-12::DAF-9::GFP	hypodermis	gc(-); sg(-)	18.4 ± 0.537	84/91	0.81	0.23
daf-9(e1406); Pche-2::DAF-9::GFP	sensory neurons	intact	17.2 ± 1.28	29/60
daf-9(e1406); Pche-2::DAF-9::GFP	sensory neurons	gc(-)	23.2 ± 1.76	26/58	0.0056
daf-9(e1406); Pche-2::DAF-9::GFP	sensory neurons	gc(-); sg(-)	23.9 ± 1.68	37/48	0.0034	0.848
